# Supplementary material
Source: PubMed Central journal article supplement (PMC3696804)
Supplement: 1302028110_pnas.201302028SI.pdf [file 1302028110_pnas.201302028SI.pdf]

# Supporting Information

Singh et al. 10.1073/pnas.1302028110

## SI Materials and Methods

**Antibodies.** Primary antibodies were against the following: large conductance  $\text{Ca}^{2+}$ - and voltage-activated  $\text{K}^{+}$  channel,  $\text{BK}_{\text{Ca}}$  (polyclonal antibody, pAb; APC021, lots AN05 and AN12, Alomone Labs), c-Myc epitope (monoclonal Ab, mAb, ab69258; and pAb, ab87854, AbCam), and voltage-dependent anion channel 1, VDAC1 (mAb, Ab14734, Abcam). Fluorophore-conjugated secondary antibodies for Western blots were the following: Alexa Fluor 680 goat anti-rabbit (A-21109, Invitrogen) and IRDye 800CW goat anti-mouse (926-32210, LI-COR) IgGs, and for immunohistochemistry were: Alexa Fluor 488 (A-11008, Molecular Probes) and Atto 647N (50185, Sigma) goat anti-mouse IgGs, and Atto 647N goat anti-rabbit IgG (15048, Active Motif).

**Isolation of Ventricular Myocytes from Left Ventricle.** Animals were injected intraperitoneally with heparin (200 IU/kg) and 20 min later they were anesthetized with sodium pentobarbital (60 mg/kg, i.p.). Hearts were then harvested and instantaneously arrested in ice-cold PBS (KCl 2 mM,  $\text{KH}_2\text{PO}_4$  1.5 mM, NaCl 138 mM,  $\text{Na}_2\text{HPO}_4$  8.1 mM) to remove excess blood. Hearts were transferred to ice-cold Tyrode's solution [NaCl 130 mM, KCl 5.4 mM,  $\text{MgCl}_2$  1 mM,  $\text{Na}_2\text{HPO}_4$  0.6 mM, Glucose 10 mM, Taurine 5 mM, 2,3-butanedione monoxime 10 mM, and Hepes 10 mM, pH 7.4, oxygenated with 95% (vol/vol)  $\text{O}_2$ -5% (vol/vol)  $\text{CO}_2$ ], and mounted on a modified Langendorff apparatus at a constant pressure of 80 cm  $\text{H}_2\text{O}$ . After 5 min of perfusion at 37 °C with Tyrode's solution, the heart was perfused for 10 min with Tyrode's solution containing 186 U/mL Collagenase Type-2 and 0.5 U/mL Protease Type-XIV, and then washed for 5 min with a high  $\text{K}^{+}$  buffer (KB) [KCl 25 mM,  $\text{KH}_2\text{PO}_4$  10 mM,  $\text{MgSO}_4$  2 mM, Glucose 20 mM, Taurine 20 mM, Creatine 5 mM, K-Glutamate 100 mM, Aspartic acid 10 mM, EGTA 0.5 mM, Hepes 5 mM, and 1% (wt/vol) BSA, pH 7.2 oxygenated with 95%  $\text{O}_2$ -5% (vol/vol)  $\text{CO}_2$ ]. For rat hearts, the enzyme-Tyrode solution was perfused for ~22 min and contained 372 U/mL Collagenase Type-2 and 1.0 U/mL Protease Type-XIV, while washing with KB was for 15 min. After washing, the left ventricle was cut into pieces in KB to dissociate cells. Isolated ventricular myocytes were filtered (100- $\mu\text{m}$  strainer), and centrifuged 2 min at 1,000  $\times g$  for further use.

**Mitochondria Isolation.** Mouse or rat left ventricles, isolated mouse left ventricular myocytes (WT or  $\text{BK}_{\text{Ca}}$  channel gene knockout, *Kcnma1*<sup>-/-</sup>) or mouse whole brain (WT) were used. Briefly, finely minced tissue or isolated cardiomyocytes were homogenized in isolation buffer A (70 mM sucrose, 210 mM mannitol, 1 mM EDTA- $\text{Na}_2$ , and 50 mM Tris-HCl, pH 7.4) using a Potter-Elvehjem homogenizer (10 rapid strokes). The homogenate was centrifuged at 1,300  $\times g$  for 3 min. The supernatant was carefully collected and centrifuged at 10,000  $\times g$  for 10 min. The pellet containing crude mitochondria was saved and resuspended in 55  $\mu\text{L}$  of isolation buffer A. The crude mitochondria preparation was gently overlaid on 3 mL of 30% (vol/vol) Percoll solution in buffer B (250 mM sucrose, 10 mM Hepes, 1 mM EDTA- $\text{Na}_2$ , pH 7.4). The sample was centrifuged at 50,000  $\times g$  for 45 min at 4 °C. After ultracentrifugation, three clear layers of mitochondria were observed, M1, M2, and M3, characterized previously (1). Purified M3 fraction was collected and centrifuged at 12,000  $\times g$  for 5 min. M3 mitochondrial pellets were washed twice with 1 mL isolation buffer A and resuspended in 100  $\mu\text{L}$  of the same buffer.

**Electron Microscopy.** Percoll-purified mitochondria were imaged by electron microscopy to confirm the integrity and purity of our preparation. The mitochondrial pellet (M3) from WT mouse was fixed in 2.5% (wt/vol) glutaraldehyde (Fluka) in buffer A for 2 h at room temperature and then stored in the same solution at 4 °C overnight. The pellet was then washed with PBS, postfixed in 2% (wt/vol) osmium tetroxide for 2 h at room temperature. Pelleted mitochondria were dehydrated in a graded alcohol series and embedded in Eponate 12 medium. The blocks were then cured at 60 °C for 48 h, and sections (70 nm) were cut with an RMC ultramicrotome, and mounted on Formvar-coated grids. The sections were double-stained with uranyl acetate and lead citrate, and examined with a 100CX JEOL transmission electron microscope.

**Western Blot Analysis.** Mouse brain or Percoll-purified mitochondria from mouse left ventricular myocytes were treated with lysis buffer [Tris-HCl 50 mM, NaCl 150 mM, EDTA- $\text{Na}_2$  1 mM, EGTA- $\text{Na}_4$  1 mM,  $\text{Na}_3\text{VO}_4$  1 mM, NaF 1 mM, 1% (vol/vol) Nonidet P-40, 0.5% (wt/vol) Na-deoxycholate and 0.1% (wt/vol) SDS, pH 7.4] containing protease inhibitors (1 tablet/50 mL; Roche), and incubated 1 h at 4 °C with shaking. Samples were centrifuged 5 min at 10,000  $\times g$  and the supernatants were collected as lysate. Proteins (50  $\mu\text{g}/\text{lane}$ ) were separated on 4–20% SDS/PAGE and transferred to nitrocellulose membranes. Loading was corroborated with Ponceau S staining. Nitrocellulose membranes were blocked with 5% (wt/vol) milk in TBS (NaCl 150 mM, Tris-HCl 20 mM, pH 7.4) at room temperature for 60 min and incubated overnight with anti- $\text{BK}_{\text{Ca}}$  pAb (2  $\mu\text{g}/\text{mL}$ ). Membranes were washed thrice with TBS and incubated with 0.01  $\mu\text{g}/\text{mL}$  secondary Abs for 60 min at room temperature. After extensive washing, membranes were visualized using Odyssey Imaging System (Li-Cor).

**Systematic Exon Scanning.** Messenger RNA (mRNA) was purified from isolated ventricular myocytes using the oligotex mRNA spin-column protocol (Qiagen). The quality of the mRNA samples was analyzed by gel electrophoresis and RNA samples with visibly twofold of 28S/18S ratio were used. cDNA was prepared using Omniscript Reverse Transcription kit (Qiagen), 2  $\mu\text{g}$  of mRNA and oligo-dT or 3'-UTR primers targeting  $\text{BK}_{\text{Ca}}$  mRNAs (Table S2). cDNAs were analyzed by PCR with gene-specific primer pairs (Table S2) to identify 200–400 bp of the predicted or constitutive  $\text{BK}_{\text{Ca}}$  exons (National Center for Biotechnology Information Gene ID 16531). All of the primer pairs were directed to different exons and had introns inbetween. The thermal cycling conditions comprised an initial denaturation step at 95 °C for 15 min and 35 cycles of 94 °C for 60 s, 58 °C for 60 s, 72 °C for 60 s, and a final step at 72 °C for 10 min. PCR products were separated on 2% (wt/vol) agarose gels, DNA bands were excised, eluted, and commercially sequenced.

**Quantification of Cardiac *Kcnma1* Transcripts.** Total RNA was purified from isolated ventricular myocytes or left ventricle using TRIzol reagent (Invitrogen). Purified RNA was digested for 10 min at room temperature with RNase-free DNase and further cleaned-up with RNeasy mini kit (Qiagen). Cleaned-up RNA (2  $\mu\text{g}$ ) was reverse-transcribed with Omniscript Reverse Transcription (RT) kit (Qiagen) using oligodT primer to obtain 20  $\mu\text{L}$  of reaction product. The reverse transcriptase was inactivated by heating at 95 °C for 5 min. Real-time PCR was performed using iQ SYBR Green Supermix (Bio-Rad), 1.6  $\mu\text{L}$  of RT reaction product, and

300 nM primer pairs (Table S3) in a 20- $\mu$ L reaction. Primer pairs flanked an intron to control contamination from genomic DNA. The thermal cycling conditions comprised an initial denaturation step at 95 °C for 3 min, and 35 cycles of 95 °C for 45 s, 60 °C for 45 s, and 72 °C for 45 s. As controls, we used mock cDNA (no-reverse transcriptase), H<sub>2</sub>O instead of template, and primers to amplify  $\beta$ -actin. All samples were run in duplicates. Threshold cycle values (C<sub>q</sub>) were measured at a relative fluorescence of ~100. Standard curves (threshold cycle vs. log of DNA concentration) were constructed amplifying known concentrations of BK<sub>Ca</sub>, BK<sub>Ca</sub>-SV27 (BK<sub>Ca</sub> containing a 27-aa splice insert), BK<sub>Ca</sub> containing the 57-aa splice insert of the stress-axis regulated exon (BK<sub>Ca</sub>-STREX), and BK<sub>Ca</sub> containing a 50-aa C-terminal splice insert (BK<sub>Ca</sub>-DEC) (Fig. S2) linearized plasmids. The efficiency of the primers was obtained from the slope of standard curves according to percent efficiency =  $(10^{-1/\text{slope}} - 1) \times 100$ , which was  $94.2 \pm 1.8\%$  for total BK<sub>Ca</sub>,  $94.9 \pm 2.9\%$  for SV27,  $97.9 \pm 1.3\%$  for STREX, and  $99.8 \pm 0.3\%$  for DEC ( $n = 3$  for each primer pair). Clear single peaks at their melting temperature in the first derivative of fluorescence (dF/dT) versus temperature plot (melting curve) and a clear band at the expected size in agarose gels confirmed the amplification of specific products. Absolute concentrations of total BK<sub>Ca</sub> and splice inserts were calculated by extrapolation from the linear fit of the respective standard curves and by correcting for primer efficiency. In ventricle samples, absolute concentrations were also corrected for the background signal obtained without RT which was ~0.01%. Percent expression was obtained by normalizing absolute concentrations of each splice insert to that of total BK<sub>Ca</sub>.

**Cardiomyocyte Transduction and Culture.** N terminus c-Myc-tagged *insertless* BK<sub>Ca</sub>, BK<sub>Ca</sub>-SV27, and BK<sub>Ca</sub>-DEC were cloned into pAd-DEST Gateway vector (Invitrogen). A silent mutation at position 1787 (TTA to TCA) was introduced to remove a *PacI* digestion site using as forward primer: CCG AGA GAG CCG TAT ATT AAT CAA TCC TGG, and as reverse primer: CCA GGA TTG ATT AAT ATA CGG CTC TCT CGG. Primers for cloning were for *insertless* BK<sub>Ca</sub> and BK<sub>Ca</sub> containing SV27: forward primer, GGGG ACA AGT TTG TAC AAA AAA GCA GGC TCC ACC ATG GGC GCC GAG GAG CAG AAG and reverse primer, GGG GAC CAC TTT GTA CAA GAA AGC TGG GTC TCA AAG CCG CTC TTC CTG CAC GTA C; and for BK<sub>Ca</sub> containing DEC: forward primer, same as for *insertless* BK<sub>Ca</sub> and reverse primer, GGG GAC CAC TTT GTA CAA GAA AGC TGG GTC TCA ACA TTC ATC TTC AAC TTC TCT GAT TGG.

Freshly isolated rat ventriculocytes were resuspended in 10 mL Ca<sup>2+</sup> solution (NaCl 120 mM, KCl 5.4 mM, MgSO<sub>4</sub> 1.2 mM, NaH<sub>2</sub>PO<sub>4</sub> 20 mM, Glucose 5.6 mM, BDM 10 mM, Taurine 5M, CaCl<sub>2</sub> 0.125 mM, and 5 mg/mL BSA, pH 7.2). Cells were allowed to sediment by gravitation for 10 min on ice. Supernatant was discarded and cells were resuspended in 10 mL Ca<sup>2+</sup> solution with 0.25 mM CaCl<sub>2</sub> and incubated for 10 min on ice. This step was repeated with 0.5 mM and 0.75 mM CaCl<sub>2</sub>. Cardiomyocytes were then resuspended in MEM containing 2.5% (vol/vol) FBS and washed three times with the same solution for 10 min each under sterile conditions. Cardiomyocytes were seeded onto coverslips (previously coated with 1 mg/mL poly-L-lysine for 60 min at 37 °C followed by 10  $\mu$ g/mL laminin for 60 min) and washed with PBS for 5 min at room temperature. Cardiomyocytes were allowed to settle for 1 h at 37 °C. Media was replaced with FBS-free MEM. After 3 h, media was aspirated and FBS-free MEM (1 mL per 35-mm Petri dish) containing adenovirus (10  $\mu$ l of  $1 \times 10^6$  pfu/mL strength) was carefully added. Cells were incubated at 37 °C for 60 min and infection media was replaced with pre-warmed FBS-free MEM. After 60 min, MEM containing 2.5% (vol/vol) FBS was added. Cells were cultured for a maximum of 36 h at 37 °C prior fixation.

**Immunolabeling.** Coverslips (0.17-mm thickness) were coated with poly-L-lysine [0.1% (vol/vol) in PBS] for seeding isolated mitochondria and cardiomyocytes. All of the biological samples preloaded with Mitotracker red CMXRos were kept in the dark on ice to prevent photobleaching.

In general, samples were washed three times with ice-cold PBS for 5 min each followed by fixation with 4% (wt/vol) para-formaldehyde in PBS for 10 min at room temperature. Samples were permeabilized with 0.5% (vol/vol) Triton-X 100 in PBS for 10 min at room temperature and blocked for nonspecific binding with 10% (vol/vol) normal goat serum in 0.2% (vol/vol) Triton-X 100/PBS for 15 min at room temperature. Samples were labeled overnight at 4 °C with specific antibodies diluted in PBS containing 1% (vol/vol) normal goat serum (NGS; Jackson ImmunoResearch) and 0.2% (vol/vol) Triton-X 100. After washing three times with PBS containing 0.2% (vol/vol) Triton-X 100, samples were incubated at room temperature for 60 min with corresponding secondary antibody conjugates Atto 647N (1  $\mu$ g/mL anti-mouse and anti-rabbit IgGs) or Alexa-488 (2  $\mu$ g/mL anti-mouse IgG) in 1% (wt/vol) NGS, 0.2% (vol/vol) Triton-X 100 in PBS. Samples were mounted for confocal microscopy with ProLongGold (Invitrogen). For stimulation emission depletion (STED) microscopy, mitochondrial preparations were successively incubated with 10%, 25%, 50%, and 97% (vol/vol) 2,2'-Thiodiethanol (TDE; Sigma-Aldrich) solutions in PBS (pH 7.5) for 5 min each at room temperature (2). Coverslips were sealed with nail polish. Confocal images in Figs. 2, 5, and 6 were acquired with an Olympus confocal microscope using a 60 $\times$  oil immersion objective with 1.42 NA (PlanApoN) at a scanning resolution of 0.0575  $\mu$ m/pixel. STED and confocal images in Fig. 3 were acquired at 3.5 nm/pixel with a custom-made confocal-STED system using an oil immersion objective (HCX PL APO CS 100 $\times$ /1.40–0.70 oil; Leica). Sequential images were acquired for the same field; acquisition of the confocal image preceded that of the STED image as described earlier (1). **Adult mouse ventriculocytes.** Freshly dissociated ventriculocytes were incubated with 200 nM Mitotracker red CMXRos (Invitrogen) for 10 min at 37 °C and rested for 2 h at 4 °C to facilitate their attachment to coverslips. After loading, cells were immediately transferred onto ice for immunolabeling. Cells were fixed, labeled with 2  $\mu$ g/mL wheat germ agglutinin (under non-permeabilized conditions), and then permeabilized to label with anti-BK<sub>Ca</sub> pAb (2  $\mu$ g/mL).

**Adult rat ventriculocytes.** Culture media was aspirated from cells transduced with adenovirus, and MEM containing 200 nM Mitotracker was added for 10 min. Cells were kept in an incubator at 37 °C. Cells were then kept on ice for immunolabeling with anti-c-Myc Ab (1  $\mu$ g/mL) prior or after permeabilization.

**Cardiac mitochondria.** Isolated mitochondria were incubated with 500 nM Mitotracker for 60 min at 4 °C on a rotator shaker to label mitochondria. After loading, mitochondria were seeded onto poly-L-lysine coated coverslips for 2 h at 4 °C, fixed, permeabilized, and labeled. Primary antibodies were anti-BK<sub>Ca</sub> (pAb, 2  $\mu$ g/mL), and anti-VDAC1 (mAb, 0.2  $\mu$ g/mL).

**Image Analysis.** Confocal images of isolated mitochondria and cardiomyocytes were median filtered (median intensities of 64  $\times$  64-pixel and 32  $\times$  32-pixel squares centered at the target pixel were subtracted from the target pixel, respectively) and analyzed using custom built software to determine the protein proximity index (PPI) as described previously (3, 4).

**Mitoplast Preparation and BK<sub>Ca</sub> Immunopurification for LC/MS/MS.** Percoll-purified mitochondria (M3 fraction) from one rat left ventricle or from one mouse brain were resuspended in hypotonic buffer (Hepes 5 mM, EDTA 2 mM, pH 7.2 adjusted with KOH) and incubated 10 min on an orbital shaker. The sample was then centrifuged 5 min at 10,000  $\times$  g. The mitoplast pellet was resuspended in isotonic buffer (KCl 150 mM, Hepes 5 mM, pH 7.2

adjusted with KOH), centrifuged 5 min at  $10,000 \times g$  and resuspended in lysis buffer. Samples were incubated 60 min at  $4^\circ\text{C}$  and centrifuged 5 min at  $10,000 \times g$ . The supernatant (lysate) was precleared with 50  $\mu\text{L}$  of protein A/G Sepharose beads for 60 min and incubated overnight at  $4^\circ\text{C}$  with beads saturated with anti-BK<sub>Ca</sub> pAb [5  $\mu\text{g}$  anti-BK<sub>Ca</sub> pAb and 25  $\mu\text{l}$  of protein A/G Sepharose beads were incubated for 60 min at  $4^\circ\text{C}$  and washed with coimmunoprecipitation buffer containing NaCl 150 mM, Tris-HCl 50 mM, EDTA-Na<sub>2</sub> 5 mM, Hepes 10 mM, 0.1% (vol/vol) Nonidet P-40, 0.25% (vol/vol) Na-deoxycholate, pH 7.4]. Proteins were eluted with SDS sample buffer for 60 min at  $37^\circ\text{C}$  and separated using 4–20% 1D SDS/PAGE followed by staining with SYPRO Ruby overnight at room temperature. For each LC/MS/MS run, gel plugs from 10 independent immunopurifications were excised from the whole gel lane (~10–300 kDa), trypsin digested, eluted (5), and combined to enrich proteins' constituent peptides. For brain mitochondria, gel plugs from a single immunopurification were used.

**Protein Identification by LC/MS/MS.** LC/MS/MS was performed at the University of California at Los Angeles W. M. Keck Proteomic Center using a Thermo LTQ-Orbitrap XL mass spectrometer equipped with an Eksigent NanoLiquid chromatography-1D plus system and an Eksigent autosampler. Proteolytic digests were loaded onto a 35 mm length, 100  $\mu\text{m}$  ID C18 pre-Trap column (CVC Microtech) and washed for 10 min with 100% Buffer A [2% (vol/vol) acetonitrile, 0.1% formic acid in H<sub>2</sub>O] at a flow rate of 5  $\mu\text{L}/\text{min}$ . The peptides were then separated on a 15 cm ProteoPep IntegraFrit column (New Objective) using a flow rate of 300 nL/min and an increasing gradient of Buffer B [98% (vol/vol) acetonitrile and 0.1% formic acid in H<sub>2</sub>O]. The following elution gradient was used: 0–15 min 0–30% (vol/vol) Buffer B, 15–20 min 30–80% (vol/vol) Buffer B and 20–22 min 80% (vol/vol) Buffer B in H<sub>2</sub>O. The column was then reequilibrated for 13 min with Buffer A. The eluting analytes were sprayed in positive mode into the LTQ-Orbitrap MS using electrospray ionization voltage of 2,300 V, capillary voltage of 45 V, tube lens of 130 V, and capillary temperature of  $200^\circ\text{C}$ . Information dependent acquisition was performed where the 6 most intense ions were selected in the  $m/z$  range of 300–1,600 using a 60 K resolution FTMS scan and subjecting them to MS-MS using broadband collision induced dissociation of normalized collision energy of 35 and LTQ detection. Peaks were excluded from further MS-MS for a period of 60 s.

The resulting MS/MS spectra were searched against Swiss-Prot database using the MASCOT Daemon search engine (Matrix Science). The following search parameters were used: peptide tolerance,  $\pm 10$  ppm; MS/MS tolerance,  $\pm 0.3$  Da; maximum missed cleavages, 2; fixed modifications, carboxymethyl (C); and variable modifications, deamidation (ND) and oxidation (M). The criteria for having a protein identified within a particular band is that there needs to be a minimum of two unique peptides that are ranked as number 1 and have ion scores with a  $P < 0.05$ .

**Langendorff Preparation.** Three-month-old male mice (WT and *Kcnma1*<sup>-/-</sup>) were injected intraperitoneally with heparin (200 IU/kg) to prevent blood coagulation. After 20 min, animals were anesthetized with sodium pentobarbital (60 mg/kg, i.p.). Hearts were rapidly harvested and arrested in cold ( $4^\circ\text{C}$ ) Krebs Henseleit bicarbonate buffer (KH): 11.1 mM glucose, 118 mM NaCl, 4.7 mM KCl, 1.2 mM MgSO<sub>4</sub>, 1.2 mM KH<sub>2</sub>PO<sub>4</sub>, 25 mM NaHCO<sub>3</sub>, and 2 mM CaCl<sub>2</sub> at pH 7.4. The heart was cleaned to remove

excess fat and noncardiac tissue. The aorta was rapidly cannulated, and the heart was retrograde-perfused with KH solution at a constant rate of 3 mL/min and maintained in air at  $37^\circ\text{C}$  in the water-jacketed chamber of a Langendorff apparatus. The buffer was constantly bubbled with 95% (vol/vol) O<sub>2</sub> and 5% (vol/vol) CO<sub>2</sub> at  $37^\circ\text{C}$ . After 20 min of equilibration, hearts were preconditioned by perfusion with KH solution supplemented with 10  $\mu\text{M}$  NS1619 or DMSO (0.01%) for 10 min, global normothermic ischemia was then performed by stopping the perfusion flow for 18 min and immersing the heart in KH solution at  $37^\circ\text{C}$  in the same chamber. At the end of 18 min, the KH solution surrounding the heart was drained and the heart was reperfused again with KH solution for 60 min at  $37^\circ\text{C}$ .

**Heart Function.** Heart function was recorded during the entire experimental duration. Left ventricular systolic pressure (LVSP), left ventricular end-diastolic pressure (LVEDP) and heart rate (HR) were recorded with a pressure transducer (1.4F Millar SPR-671, Power Lab; AD Instruments), which was directly inserted in the LV through a left atrial incision that exposed the mitral annulus. The LV developed pressure (LVDP) and the rate pressure product (RPP) were calculated according to: LVDP = LVSP – LVEDP, and RPP = HR  $\times$  LVDP. The maximum rate of the LV contraction velocity ( $dP/dt_{\text{max}}$ ) and the maximum isovolumetric rate of relaxation ( $-dP/dt_{\text{min}}$ ) were calculated directly from the recordings (LabChart5.5; ADInstruments).

**Myocardium Infarct Size.** Myocardial infarction was assessed by staining heart sections with 2,3,5-triphenyltetrazolium chloride (TTC). At the end of reperfusion, hearts were cut into four transverse sections parallel to the atrioventricular groove. Heart slices were incubated for 10 min in 1% (wt/vol) TTC in Tris-HCl (pH = 7.4) at  $37^\circ\text{C}$  followed by fixation with 4% (wt/vol) paraformaldehyde. This staining procedure differentiates the infarcted (pale) from the viable (brick red) myocardial tissue. The slices were photographed using digital microscopic imaging. The area of necrosis was quantified by computerized planimetry with Adobe Photoshop. Total area of necrosis was calculated, and expressed as the percentage of the total left ventricular area.

**Mitochondrial Calcium Retention Capacity.** Crude mitochondria were isolated at 10 min of preischemic reperfusion as described above. Free Ca<sup>2+</sup> concentration outside the mitochondria was continuously recorded using calcium green-5N (Invitrogen) and an AMINCO-Bowman Series 2 (AB2) spectrofluorometer. Excitation and emission wavelengths were set at 500 and 530 nm, respectively. Measurements were performed at  $28^\circ\text{C}$  under constant stirring. The recording buffer was: 150 mM sucrose, 50 mM KCl, 2 mM KH<sub>2</sub>PO<sub>4</sub>, 5 mM succinic acid and 20 mM Tris-HCl, pH 7.4 supplemented with 0.5  $\mu\text{M}$  calcium green 5-N. Baseline fluorescence was recorded using recording buffer alone. Mitochondria (0.5 mg protein) were then added to the 2-mL spectrofluorometer cuvette and mitochondrial Ca<sup>2+</sup> uptake was recorded for 90 s. After this period, CaCl<sub>2</sub> pulses (40 nmol) were applied every 60 s until a massive release of Ca<sup>2+</sup> was induced, presumably because of the opening of the permeability transition pore. Recordings were normalized to the maximum fluorescence prior mitochondria addition ( $\Delta F/F$ ). The Ca<sup>2+</sup> retention capacity was defined as the amount of Ca<sup>2+</sup> required to trigger the massive Ca<sup>2+</sup> release and was expressed as nmol of CaCl<sub>2</sub>/mg mitochondria protein (6).

- Singh H, et al. (2012) Visualization and quantification of cardiac mitochondrial protein clusters with STED microscopy. *Mitochondrion* 12(2):230–236.
- Staudt T, Lang MC, Medda R, Engelhardt J, Hell SW (2007) 2,2'-thiodiethanol: A new water soluble mounting medium for high resolution optical microscopy. *Microworld Tech* 70(1):1–9.

- Li M, et al. (2010) Thromboxane A2 receptor and MaxiK-channel intimate interaction supports channel trans-inhibition independent of G-protein activation. *Proc Natl Acad Sci USA* 107(44):19096–19101.
- Wu Y, et al. (2010) Quantitative determination of spatial protein-protein correlations in fluorescence confocal microscopy. *Biophys J* 98(3):493–504.

5. Singh H, Warburton S, Vondriska TM, Khakh BS (2009) Proteomics to identify proteins interacting with P2X2 ligand-gated cation channels. *J Vis Exp* 1178(27):pii, 1178.

6. Bopassa JC, Eghbali M, Toro L, Stefani E (2010) A novel estrogen receptor GPER inhibits mitochondria permeability transition pore opening and protects the heart against ischemia-reperfusion injury. *Am J Physiol Heart Circ Physiol* 298(1):H16-H23.

```

1  MANGGGGGGGSSGSSGGGGGGGGSLRMSNIHANHLSLDASSSSSS
51  SSSSSSSSSSVHEPKMDALIIPVTMEVPCDSRGQRMWWAFLASSMVTFFG
101 GLFIIILLWRTLKYLWTVCCHCGGKTKEAQKINNGSSQADGTLKPVDEKEE
151 VVAEEVGMWTSVKDWAGVMISAQHITGRVIVVIVFALSIGALVIYFIDSS
201 NPTESCQNFYKDFTLQIDMAFNVFFLLYFGLRFIAANDKLFWFLEVNSVV
251 DFFTVPVVFVSVYLNRSWLGRLFRALRLIQFSEILQFINLLKTSNSIKL
301 VNLLSIFISTWLTAAGF IHLVENS G DPWENFQNNQALTYWECVYLLMVTM
351 STVGYGDVYAKTTLGRLFMVFFILGGLAMFASYVPEIIEELIGNRKKYGGG
401 YSAVSGRKHIVVCGHITLESVSNFLKDFLHKDRDDVNVEIVFLHNISPNI
451 EELALFKRHFQVEFYQGSVLNPHDLARVKIESADACLILANKYCADPDA
501 EDASNIMRVISIKNYHPKIRIITQMLQYHNKAHLLNIPSWNKEGDDAIC
551 LAELKLGFIAQSCLAQGLSTMLANLFSMRSFKIEEDTWQKYYLEGVSNE
601 MYTEYLSSAFVGLSFPTVCELCFVKLKLMLIAIEYKSANRESRSRKRILLI
651 NPGNHLKIQEGTLGFFIASDAKEVKRAFFYCKACHDDVDPKRIKCGCR
701 RLEDEQPPTLSPKKKQRNGMRNSPNTSPKLMRHDPLLI PGNDQIDNMDS
751 NVKKYDSTGMFHWCAKPEIEKVILTRSEAAMTVLSGHVVVICFGDVSAL
801 IGLRNLVMPLRASNFHYHELKHIVFVGSIEYLKREWETLHNFPKVSIILPG
851 TPLSRADLRAVNINLCDCMVILSANQNNIDDTSLQDKECILASLNKSMQ
901 FDDSIGVLQANSQGFPPGMDRSPDNSPVHGMLRQPSITGVNPIIITE
951 LAKPGKLPVSVNQEKNSGTHILMITELVNDTNVQFLDQDDDDDPDTELY
1001 LTQPFACGTAFVSVLDSIMSATYFNDNILLTIRTLVTTGGATPELEALIA
1051 EENALRGGYSTPQTLANRDRCRVAQLALLDGPFDLGDGGCYGDLFCKAL
1101 KTYNMLCFGIYRLRDAHLSTPSQCTKRYVITNPPYEFELVPTDLIFCLMQ
1151 FDHNAGQSRASLSHSSHSQSSSKSSSVHSIPSTANRPNRPKSRESRDK
1201 QKKEMVYR

```

Fig. S1. Peptides identified by LC/MS/MS analysis of brain mitoplasts. Amino acid sequence of BK<sub>Ca</sub> showing peptides identified by LC/MS/MS. Twenty-one unique peptides (underlined) were identified in the N terminus, transmembrane domains (dashed squares), and C terminus (gray shade).

|                |            |              |             |            |            |      |
|----------------|------------|--------------|-------------|------------|------------|------|
|                | <b>M1</b>  |              | <b>M2</b>   |            |            |      |
| <i>mKcnma1</i> | MANGGGGGG  | SSGGGGGG     | GSGLRMSNI   | HANHLSDAS  | SSSSSSSS   | 50   |
| <i>hKcnma1</i> | MANGGGGGG  | SSGGGGGG     | GSGLRMSNI   | HANHLSDAS  | SSSSSSSS   | 50   |
|                |            | <b>M3</b>    |             | <b>S0</b>  |            |      |
| <i>mKcnma1</i> | SSSSSSSS   | -VHEPKQDAL   | IIPVTMEVPC  | DSRGQRMWA  | FLASSMVTFF | 99   |
| <i>hKcnma1</i> | SSSSSSSS   | SSHEPKQDAL   | IIPVTMEVPC  | DSRGQRMWA  | FLASSMVTFF | 100  |
| <i>mKcnma1</i> | GGLFILLWR  | TLKYLWTVCC   | HCGGKTKEAQ  | KINNGSSQAD | GTLKPVDEKE | 149  |
| <i>hKcnma1</i> | GGLFILLWR  | TLKYLWTVCC   | HCGGKTKEAQ  | KINNGSSQAD | GTLKPVDEKE | 150  |
|                |            |              | <b>S1</b>   |            |            |      |
| <i>mKcnma1</i> | EVVAAEVGWM | TSVKDWAGVM   | ISAQTLTGRV  | LVVLVFAISI | GALVIYFIDS | 199  |
| <i>hKcnma1</i> | EAVAAEVGWM | TSVKDWAGVM   | ISAQTLTGRV  | LVVLVFAISI | GALVIYFIDS | 200  |
|                |            | <b>S2</b>    |             |            |            |      |
| <i>mKcnma1</i> | SNPIESCQNF | YKDFTLQIDM   | AFNVFFLLYF  | GLRFIAANDK | LWFWEVNSV  | 249  |
| <i>hKcnma1</i> | SNPIESCQNF | YKDFTLQIDM   | AFNVFFLLYF  | GLRFIAANDK | LWFWEVNSV  | 250  |
|                | <b>S3</b>  |              | <b>S4</b>   |            |            |      |
| <i>mKcnma1</i> | VDFFTVPPVF | VSVYLNRSWL   | GLRFLRALRL  | IQFSEILQFL | NILKTSNSIK | 299  |
| <i>hKcnma1</i> | VDFFTVPPVF | VSVYLNRSWL   | GLRFLRALRL  | IQFSEILQFL | NILKTSNSIK | 300  |
|                | <b>S5</b>  |              |             |            |            |      |
| <i>mKcnma1</i> | LVNLLSIFIS | TWLTAAAGFIH  | LVENSQDPWE  | NFQNNQALTY | WECVYLLMVT | 349  |
| <i>hKcnma1</i> | LVNLLSIFIS | TWLTAAAGFIH  | LVENSQDPWE  | NFQNNQALTY | WECVYLLMVT | 350  |
|                |            |              | <b>PORE</b> |            |            |      |
|                |            | <b>S6</b>    |             |            |            |      |
| <i>mKcnma1</i> | MSTVGYGDVY | AKTTLGRIFM   | VFFILGGLAM  | FASYVPEIIE | LIGNRRKYGG | 399  |
| <i>hKcnma1</i> | MSTVGYGDVY | AKTTLGRIFM   | VFFILGGLAM  | FASYVPEIIE | LIGNRRKYGG | 400  |
| <i>mKcnma1</i> | SYSAVSGRKH | IVVCGHITL    | SVSNFLKDFL  | HKDRDDVNV  | IVFLHNISP  | 449  |
| <i>hKcnma1</i> | SYSAVSGRKH | IVVCGHITL    | SVSNFLKDFL  | HKDRDDVNV  | IVFLHNISP  | 450  |
| <i>mKcnma1</i> | LELEALFKRH | FTQVEFYQGS   | VLNPHDLARV  | KIESADACLI | LANKYCADPD | 499  |
| <i>hKcnma1</i> | LELEALFKRH | FTQVEFYQGS   | VLNPHDLARV  | KIESADACLI | LANKYCADPD | 500  |
| <i>mKcnma1</i> | AEDASNIMRV | ISIKNYHPKI   | RIITQMLQYH  | NKAHLLNIPS | WNWKEGDDAI | 549  |
| <i>hKcnma1</i> | AEDASNIMRV | ISIKNYHPKI   | RIITQMLQYH  | NKAHLLNIPS | WNWKEGDDAI | 550  |
| <i>mKcnma1</i> | CLAELKLGFI | AQSCLAQGLS   | TMLANLFSMR  | SFIKIEEDTW | QKYYLEGVS  | 599  |
| <i>hKcnma1</i> | CLAELKLGFI | AQSCLAQGLS   | TMLANLFSMR  | SFIKIEEDTW | QKYYLEGVS  | 600  |
| <i>mKcnma1</i> | EMYTEYLSSA | FVGLSFPTVC   | ELCFVKLKL   | MIAIEYKSAN | RESRILINPG | 649  |
| <i>hKcnma1</i> | EMYTEYLSSA | FVGLSFPTVC   | ELCFVKLKL   | MIAIEYKSAN | RESRILINPG | 650  |
|                |            | <b>STREX</b> |             |            |            |      |
| <i>mKcnma1</i> | NHLKIQEGLT | GFPIASDAKE   | VKRAFFYCKA  | CHDDVTDPKR | IKKCGCKRLE | 699  |
| <i>hKcnma1</i> | NHLKIQEGLT | GFPIASDAKE   | VKRAFFYCKA  | CHDDITDPKR | IKKCGCKRLE | 700  |
| <i>mKcnma1</i> | DEQPPTLSPK | KKQRNGGMRN   | SPNTSPKLMR  | HDPLLPNGD  | QIDNMDSNVK | 749  |
| <i>hKcnma1</i> | DEQPPTLSPK | KKQRNGGMRN   | SPNTSPKLMR  | HDPLLPNGD  | QIDNMDSNVK | 750  |
| <i>mKcnma1</i> | KYDSTGMFHW | CAPKEIEKVI   | LTRSEAMTV   | LSGHVVVICF | GDVSSALIGL | 799  |
| <i>hKcnma1</i> | KYDSTGMFHW | CAPKEIEKVI   | LTRSEAMTV   | LSGHVVVICF | GDVSSALIGL | 800  |
| <i>mKcnma1</i> | RNLVMPLRAS | NFHYHELKHI   | VFVGSIEYLK  | REWETLHNFP | KVSILPGTPL | 849  |
| <i>hKcnma1</i> | RNLVMPLRAS | NFHYHELKHI   | VFVGSIEYLK  | REWETLHNFP | KVSILPGTPL | 850  |
| <i>mKcnma1</i> | SRADLRAVNI | NLCDMCVILS   | ANQNNIDDT   | LQDKECILAS | LNKSMQFDD  | 899  |
| <i>hKcnma1</i> | SRADLRAVNI | NLCDMCVILS   | ANQNNIDDT   | LQDKECILAS | LNKSMQFDD  | 900  |
|                |            | <b>SV27</b>  |             |            |            |      |
| <i>mKcnma1</i> | SIGVLQANSQ | GFTPPGMDRS   | SPDNSPVHGM  | LRQPSITTVG | NIPITTEIVN | 949  |
| <i>hKcnma1</i> | SIGVLQANSQ | GFTPPGMDRS   | SPDNSPVHGM  | LRQPSITTVG | NIPITTEIVN | 950  |
| <i>mKcnma1</i> | DTNVQFLDQD | DDDDPDTELY   | LTQPFACGTA  | FAVSVLDSLM | SATYFNDNIL | 999  |
| <i>hKcnma1</i> | DTNVQFLDQD | DDDDPDTELY   | LTQPFACGTA  | FAVSVLDSLM | SATYFNDNIL | 1000 |
| <i>mKcnma1</i> | TLIRTLVTGG | ATPELEALIA   | EENALRGYS   | TPQTLANRDR | CRVAQLALLD | 1049 |
| <i>hKcnma1</i> | TLIRTLVTGG | ATPELEALIA   | EENALRGYS   | TPQTLANRDR | CRVAQLALLD | 1050 |
| <i>mKcnma1</i> | GPFADLGDGG | CYGDLFCKAL   | KTYNMLCFGI  | YRLRDAHLST | PSQCTKRYVI | 1099 |
| <i>hKcnma1</i> | GPFADLGDGG | CYGDLFCKAL   | KTYNMLCFGI  | YRLRDAHLST | PSQCTKRYVI | 1100 |
| <i>mKcnma1</i> | TNPPYEFELV | PTDLIFCLMQ   | FDHNAGQSRA  | SLSHSSHSSQ | SSSKKSSSVH | 1149 |
| <i>hKcnma1</i> | TNPPYEFELV | PTDLIFCLMQ   | FDHNAGQSRA  | SLSHSSHSSQ | SSSKKSSSVH | 1150 |
|                |            | <b>DEC</b>   |             |            |            |      |
| <i>mKcnma1</i> | SIPSTANRPN | RPKSRESRDK   | QKVVQEERL*  |            |            | 1172 |
| <i>mKcnma1</i> | SIPSTANRPN | RPKSRESRDK   | QKVVQEERL*  |            |            | 1178 |
| <i>hKcnma1</i> | SIPSTANRPN | RPKSRESRDK   | QKVVQEERL*  |            |            | 1179 |

**Fig. S2.** Alignment of mitochondrial BK<sub>Ca</sub> with human BK<sub>Ca</sub>. Sequence alignment with constitutive human BK<sub>Ca</sub> shows that identified mouse cardiac BK<sub>Ca</sub> is identical to the human isoform. The boxed residues in italics were undefined in our sequences. Sequences of three alternatively spliced exons were identified (boxed), STREX, SV27, and DEC in the cardiac BK<sub>Ca</sub>. Transmembrane domains (S0–S6) and pore region are also highlighted. M1, M2, and M3 mark three possible start sites.
